# Supplementary material for: Heavy Metal Induced Antibiotic Resistance in Bacterium LSJC7
Source: PubMed Central journal article supplement (PMC4632705; doi:10.3390/ijms161023390), 2015-09-29
Supplement: ijms-16-23390-s001.pdf [file ijms-16-23390-s001.pdf]

## Supplementary Information

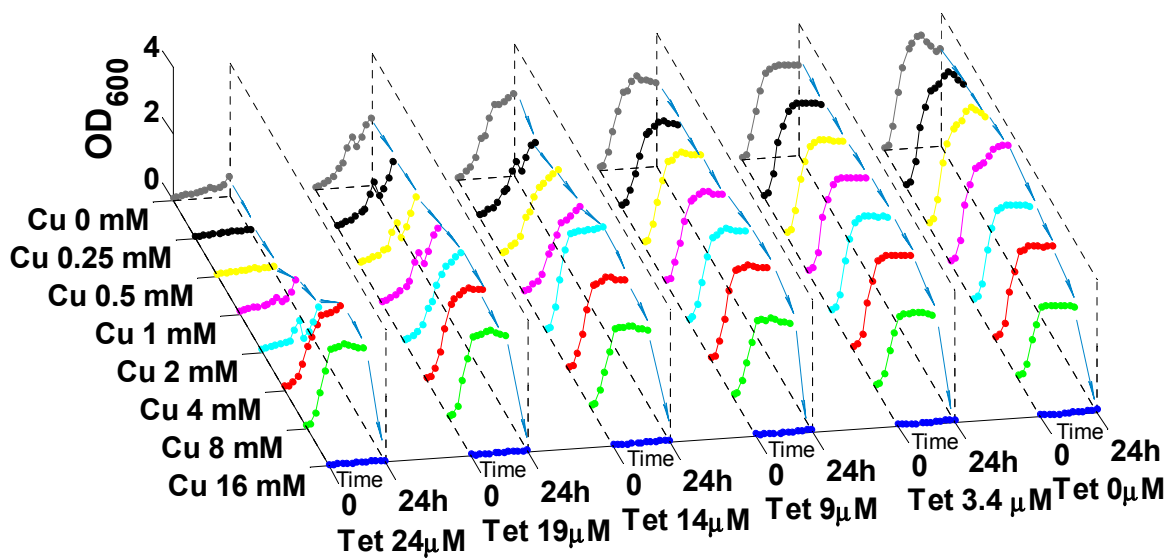

**Figure S1.** Growth curve of LSJC7 with tetracycline (Tet) and copper (Cu) co-treatment. Each point is presented as mean  $\pm$  SD ( $n = 3$ ).

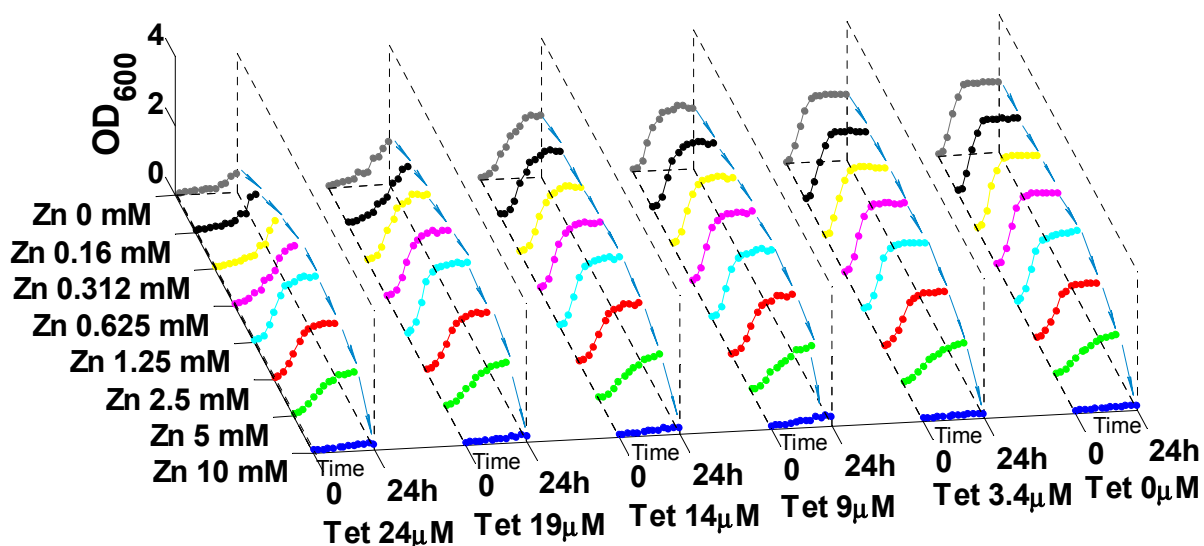

**Figure S2.** Growth curve of LSJC7 with tetracycline (Tet) and Zinc (Zn) co-treatment. Each point is presented as mean  $\pm$  SD ( $n = 3$ ).

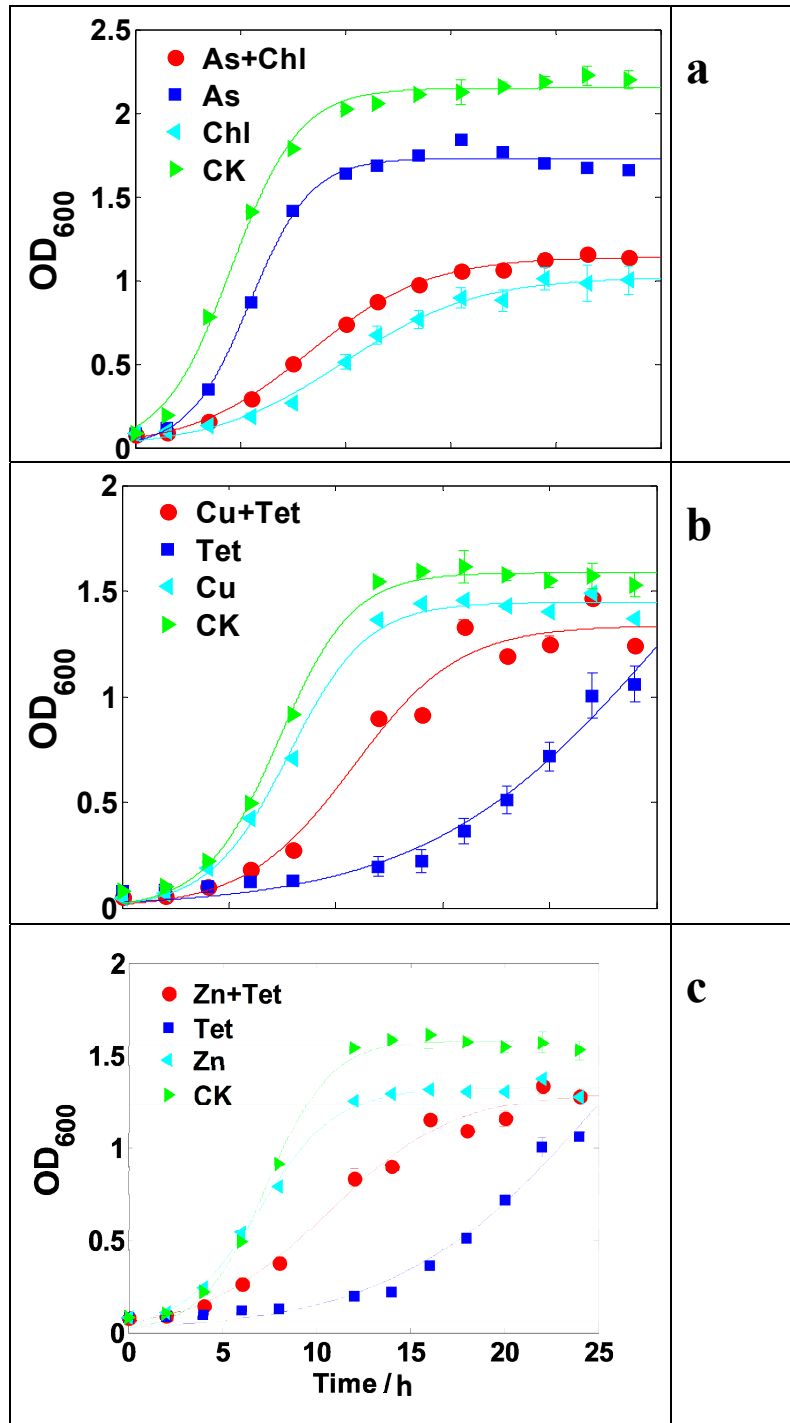

**Figure S3.** Growth curve of LSCJ7 and *E. coli* DH5α with antibiotic and heavy metal co-treatment. (a) Growth curve of LSCJ7 with 4 mM arsenate (As) and 77 μM chloramphenicol (Chl) cotreatment; (b) Growth curve of *E. coli* DH5α with 2 mM copper (Cu) and 2 μM tetracycline (Tet) cotreatment; (c) Growth curve of *E. coli* DH5α with 0.625 mM zinc (Zn) and 2 μM Tet cotreatment. Each point is presented as mean ± SD ( $n = 3$ ). Growth curves are fitted by logistic model.

**Table S1.** Genes involved in metal(loid) resistance that were identified in the draft genome of LSJC7.

| <b>Metal(loid)</b> | <b>Gene Locus_Tag</b>                                                                 | <b>Function</b>                                             |
|--------------------|---------------------------------------------------------------------------------------|-------------------------------------------------------------|
| Arsenic            | LSJC7GL001421,<br>LSJC7GL001422,<br>LSJC7GL001423,<br>LSJC7GL001424,<br>LSJC7GL001425 | Arsenical resistance gene cluster ArsRDABC                  |
| -                  | LSJC7GL002469,<br>LSJC7GL002470,<br>LSJC7GL002471                                     | Arsenical resistance gene cluster ArsRBC                    |
| -                  | LSJC7GL002190,<br>LSJC7GL002205,                                                      | Arsenate reductase ArsC                                     |
| -                  | LSJC7GL001573                                                                         | Arsenical pump membrane protein ArsB                        |
| Copper             | LSJC7GL00191                                                                          | Copper-transporting P-type ATPase CopA                      |
| -                  | LSJC7GL00881                                                                          | Copper resistance protein CopC                              |
| -                  | LSJC7GL00882                                                                          | Copper export protein P PcoD                                |
| Zinc               | LSJC7GL000454                                                                         | Zinc transporter zitB                                       |
| -                  | LSJC7GL001091                                                                         | Zinc transport protein ZntB                                 |
| Cadmium            | LSJC7GL003182                                                                         | Cadmium, lead, zinc and mercury-transporting<br>ATPase ZntA |
| Chromate           | LSJC7GL001346                                                                         | chromate reductase                                          |
| -                  | LSJC7GL004041                                                                         | chromate reductase monomer                                  |

**Table S2.** Genes involved in antibiotic resistance that were identified in the draft genome of LSJC7.

| <b>Antibiotic</b> | <b>Gene Locus_Tag</b>                                                                          | <b>Function</b>                                                                                |
|-------------------|------------------------------------------------------------------------------------------------|------------------------------------------------------------------------------------------------|
| Tetracycline      | LSJC7GL003015, LSJC7GL002387,<br>LSJC7GL003618                                                 | Ribosomal protection protein TetM                                                              |
| -                 | LSJC7GL002366                                                                                  | Ribosomal protection protein Tetpb                                                             |
| -                 | LSJC7GL004289                                                                                  | Ribosomal protection protein Otra                                                              |
| -                 | LSJC7GL003544                                                                                  | Tetracycline efflux pump Otrb                                                                  |
| -                 | LSJC7GL003544, LSJC7GL004005,<br>LSJC7GL000161, LSJC7GL000896,<br>LSJC7GL001857, LSJC7GL000962 | Tetracycline resistance protein/<br>tetracycline efflux pump TetB                              |
| -                 | LSJC7GL003544                                                                                  | Tetracycline efflux pump Otrb                                                                  |
| -                 | LSJC7GL002274                                                                                  | Tetracycline efflux pump Tet39                                                                 |
| -                 | LSJC7GL000047, LSJC7GL002899                                                                   | tetracycline modification enzyme tet34                                                         |
| Chloramphenicol   | LSJC7GL001635<br>LSJC7GL000534                                                                 | Chloramphenicol efflux pump Cml Multidrug/<br>chloramphenicol efflux transport<br>protein MdfA |
| -                 | LSJC7GL001639                                                                                  | Bicyclomycin/chloramphenicol resistance<br>protein YdhC                                        |
| -                 | LSJC7GL001959                                                                                  | Bicyclomycin/chloramphenicol resistance<br>protein Bcr                                         |
| Ampicillin        | LSJC7GL001204                                                                                  | Beta-lactamase ampC                                                                            |

**Table S3.** Genes involved in co-regulation system that were identified in the draft genome of LSJC7.

| <b>Efflux Pump</b> | <b>Pump Locus_Tag</b>                             | <b>Regulator</b> | <b>Regulator Locus_Tag</b>                                                          | <b>Inducible Signal</b>       | <b>Reference</b> |
|--------------------|---------------------------------------------------|------------------|-------------------------------------------------------------------------------------|-------------------------------|------------------|
| AcrD               | LSJC7GL002188                                     | BaeSR<br>CpxAR   | LSJC7GL001858,<br>LSJC7GL001859<br>LSJC7GL004139,<br>LSJC7GL004140                  | Zinc, copper<br>Zinc, copper  | [42]             |
| MdtABC             | LSJC7GL001854,<br>LSJC7GL001855,<br>LSJC7GL001856 | BaeSR<br>CpxAR   | LSJC7GL001858,<br>LSJC7GL001859<br>LSJC7GL004139,<br>LSJC7GL004140                  | Zinc, copper<br>Zinc, copper  | [42]             |
| AcrAB              | LSJC7GL000169<br>LSJC7GL000170                    | MarRAB<br>SoxRS  | LSJC7GL001469,<br>LSJC7GL001470,<br>LSJC7GL001471<br>LSJC7GL002479<br>LSJC7GL002480 | Copper<br>Chromate,<br>copper | [43,45]          |
